# Supplementary material
Source: PubMed Central journal article supplement (PMC3085663)
Supplement: NIHMS279681-supplement-2.pdf [file NIHMS279681-supplement-2.pdf]

**Table S1. Selection criteria for 121 microRNAs used in GBM classification**

| miRNAs         | Neuro-developm ent | Highly variable (MAD > 1) | Survival (univariate Cox <i>P</i> < 0.1) | Univariate Cox <i>P</i> | Exp (coef.) | S.E. (coef.) |
|----------------|--------------------|---------------------------|------------------------------------------|-------------------------|-------------|--------------|
| hsa-let-7a     | ■                  |                           |                                          | 0.77771                 | 0.97621     | 0.08527      |
| hsa-let-7b     | ■                  |                           |                                          | 0.42139                 | 1.05692     | 0.06886      |
| hsa-let-7c     | ■                  |                           |                                          | 0.31007                 | 1.07914     | 0.07503      |
| hsa-let-7d     | ■                  |                           |                                          | 0.4134                  | 1.06466     | 0.0766       |
| hsa-let-7e     |                    |                           | ■                                        | 0.0833                  | 1.135       | 0.07312      |
| hsa-let-7i     | ■                  |                           |                                          | 0.94184                 | 1.00375     | 0.05133      |
| hsa-mir-100    | ■                  |                           |                                          | 0.35745                 | 1.05397     | 0.05712      |
| hsa-mir-106a   |                    |                           | ■                                        | 0.04631                 | 0.90093     | 0.05236      |
| hsa-mir-10b    |                    | ■                         |                                          | 0.23695                 | 1.03396     | 0.02824      |
| hsa-mir-124a   | ■                  | ■                         |                                          | 0.3175                  | 1.02191     | 0.02168      |
| hsa-mir-125a   |                    |                           |                                          | 0.81168                 | 1.01449     | 0.06038      |
| hsa-mir-125b   | ■                  |                           |                                          | 0.27059                 | 1.07133     | 0.06254      |
| hsa-mir-126    |                    | ■                         |                                          | 0.81701                 | 1.01006     | 0.04325      |
| hsa-mir-126*   |                    |                           |                                          | 0.7715                  | 1.01006     | 0.04325      |
| hsa-mir-127    |                    | ■                         |                                          | 0.79928                 | 1.00985     | 0.03855      |
| hsa-mir-128a   | ■                  |                           |                                          | 0.73562                 | 0.98037     | 0.05871      |
| hsa-mir-128b   |                    | ■                         |                                          | 0.82188                 | 0.98887     | 0.04972      |
| hsa-mir-130a   |                    |                           |                                          | 0.30722                 | 0.92643     | 0.07484      |
| hsa-mir-135a   | ■                  | ■                         |                                          | 0.96171                 | 1.00195     | 0.04056      |
| hsa-mir-135b   | ■                  |                           |                                          | 0.12169                 | 1.19032     | 0.11257      |
| hsa-mir-136    |                    | ■                         |                                          | 0.63126                 | 1.01994     | 0.04113      |
| hsa-mir-137    |                    |                           | ■                                        | 0.06828                 | 1.10274     | 0.05364      |
| hsa-mir-142-3p |                    | ■                         | ■                                        | 0.09863                 | 1.06816     | 0.03992      |
| hsa-mir-143    | ■                  |                           |                                          | 0.8458                  | 0.99058     | 0.04869      |
| hsa-mir-145    |                    |                           |                                          | 0.5648                  | 0.97386     | 0.04601      |
| hsa-mir-146a   | ■                  |                           |                                          | 0.68383                 | 1.03031     | 0.07332      |
| hsa-mir-146b   | ■                  | ■                         | ■                                        | 0.00812                 | 1.11863     | 0.04235      |
| hsa-mir-148a   |                    | ■                         |                                          | 2.7E-05                 | 1.15147     | 0.03357      |
| hsa-mir-149    |                    | ■                         |                                          | 0.13561                 | 1.06139     | 0.03992      |
| hsa-mir-155    | ■                  |                           | ■                                        | 0.05758                 | 1.08826     | 0.04454      |
| hsa-mir-17-3p  | ■                  |                           |                                          | 0.01362                 | 0.81648     | 0.08219      |
| hsa-mir-17-5p  |                    |                           | ■                                        | 0.01069                 | 0.86967     | 0.05471      |
| hsa-mir-181a   | ■                  |                           | ■                                        | 0.06218                 | 0.89591     | 0.05893      |
| hsa-mir-181b   | ■                  |                           |                                          | 0.15325                 | 0.91077     | 0.06545      |
| hsa-mir-182    | ■                  | ■                         | ■                                        | 0.07638                 | 0.95545     | 0.02572      |
| hsa-mir-182*   |                    | ■                         |                                          | 0.07638                 | 0.95545     | 0.02572      |
| hsa-mir-183    | ■                  |                           |                                          | 0.15705                 | 0.933       | 0.04901      |
| hsa-mir-18a    |                    |                           | ■                                        | 0.06739                 | 0.88152     | 0.06895      |
| hsa-mir-191    | ■                  |                           |                                          | 0.30016                 | 1.11282     | 0.10317      |
| hsa-mir-192    |                    |                           | ■                                        | 0.05473                 | 1.18421     | 0.08802      |
| hsa-mir-193a   | ■                  |                           |                                          | 0.12126                 | 1.09221     | 0.05692      |
| hsa-mir-193b   | ■                  |                           |                                          | 0.16561                 | 1.07398     | 0.05148      |
| hsa-mir-195    |                    | ■                         |                                          | 0.70454                 | 1.01587     | 0.04151      |

|                |   |   |         |         |         |
|----------------|---|---|---------|---------|---------|
| hsa-mir-196a   |   |   | 0.00799 | 1.13723 | 0.04848 |
| hsa-mir-196b   |   |   | 0.07287 | 1.09672 | 0.05147 |
| hsa-mir-19a    | ■ |   | 0.01489 | 0.89489 | 0.0456  |
| hsa-mir-19b    |   |   | 0.03647 | 0.91017 | 0.045   |
| hsa-mir-200a   | ■ |   | 0.01121 | 1.50213 | 0.16043 |
| hsa-mir-200b   |   |   | 0.03248 | 1.29539 | 0.12102 |
| hsa-mir-204    |   | ■ | 0.01135 | 1.05991 | 0.02298 |
| hsa-mir-206    |   |   | 0.06575 | 0.66793 | 0.21932 |
| hsa-mir-20a    |   | ■ | 0.03758 | 0.90463 | 0.0482  |
| hsa-mir-21     | ■ |   | 0.05936 | 1.06825 | 0.03501 |
| hsa-mir-210    | ■ |   | 0.01615 | 1.09525 | 0.03782 |
| hsa-mir-218    | ■ |   | 0.17308 | 1.09911 | 0.06936 |
| hsa-mir-219    | ■ | ■ | 0.71885 | 0.99203 | 0.02223 |
| hsa-mir-22     | ■ |   | 0.05999 | 1.10087 | 0.05109 |
| hsa-mir-221    | ■ |   | 0.00031 | 1.1511  | 0.03904 |
| hsa-mir-222    |   | ■ | 1.1E-05 | 1.1286  | 0.02757 |
| hsa-mir-223    | ■ |   | 0.36143 | 1.03793 | 0.04079 |
| hsa-mir-23a    | ■ |   | 0.72916 | 1.01978 | 0.05658 |
| hsa-mir-23b    | ■ |   | 0.11757 | 1.09921 | 0.06044 |
| hsa-mir-24     | ■ |   | 0.13146 | 1.12864 | 0.08023 |
| hsa-mir-25     | ■ |   | 0.30899 | 0.94102 | 0.05975 |
| hsa-mir-26a    | ■ |   | 0.12495 | 1.06536 | 0.04126 |
| hsa-mir-26b    | ■ |   | 0.32377 | 0.93938 | 0.06338 |
| hsa-mir-27a    | ■ |   | 0.81219 | 0.98763 | 0.0524  |
| hsa-mir-27b    | ■ |   | 0.30332 | 1.05589 | 0.05284 |
| hsa-mir-29a    | ■ |   | 0.1248  | 1.09252 | 0.05765 |
| hsa-mir-29b    | ■ |   | 0.11261 | 1.07242 | 0.04407 |
| hsa-mir-29c    |   | ■ | 0.03431 | 1.1272  | 0.05658 |
| hsa-mir-30a-5p | ■ |   | 0.13913 | 1.08106 | 0.0527  |
| hsa-mir-31     |   | ■ | 2.9E-05 | 1.30289 | 0.0633  |
| hsa-mir-335    |   | ■ | 0.01355 | 1.11745 | 0.04498 |
| hsa-mir-338    |   | ■ | 0.83133 | 0.994   | 0.02825 |
| hsa-mir-339    |   | ■ | 0.0374  | 1.13656 | 0.0615  |
| hsa-mir-340    |   | ■ | 0.01345 | 0.78054 | 0.10024 |
| hsa-mir-345    |   |   | 0.06495 | 0.81711 | 0.10944 |
| hsa-mir-34a    |   | ■ | 0.00271 | 1.09391 | 0.02993 |
| hsa-mir-34b    |   |   | 0.0412  | 1.08863 | 0.0416  |
| hsa-mir-362    |   | ■ | 0.03455 | 0.76664 | 0.12573 |
| hsa-mir-370    |   | ■ | 0.17164 | 0.96975 | 0.02247 |
| hsa-mir-376a   |   | ■ | 0.96693 | 1.00156 | 0.03765 |
| hsa-mir-376a*  |   | ■ | 0.85639 | 1.00156 | 0.03765 |
| hsa-mir-377    |   | ■ | 0.47876 | 1.0293  | 0.04077 |
| hsa-mir-424    |   | ■ | 0.92656 | 0.99571 | 0.04669 |
| hsa-mir-425-5p |   | ■ | 0.00551 | 1.36523 | 0.11217 |
| hsa-mir-451    |   | ■ | 0.61227 | 1.01375 | 0.02694 |
| hsa-mir-452    |   | ■ | 0.06402 | 0.90048 | 0.0566  |
| hsa-mir-486    |   | ■ | 0.64347 | 1.02142 | 0.04579 |
| hsa-mir-487b   |   | ■ | 0.0737  | 1.11374 | 0.06023 |

|                |  |  |         |         |         |
|----------------|--|--|---------|---------|---------|
| hsa-mir-490    |  |  | 0.03345 | 0.55447 | 0.27731 |
| hsa-mir-492    |  |  | 0.01609 | 0.62793 | 0.19334 |
| hsa-mir-493-3p |  |  | 0.09419 | 0.88844 | 0.07067 |
| hsa-mir-494    |  |  | 0.36601 | 0.96408 | 0.04047 |
| hsa-mir-504    |  |  | 0.0338  | 0.73557 | 0.1447  |
| hsa-mir-505    |  |  | 0.00459 | 0.38504 | 0.33668 |
| hsa-mir-513    |  |  | 0.24702 | 0.95275 | 0.04181 |
| hsa-mir-565    |  |  | 0.01923 | 1.09829 | 0.04005 |
| hsa-mir-572    |  |  | 0.01686 | 0.87961 | 0.05368 |
| hsa-mir-575    |  |  | 0.84624 | 0.99236 | 0.03955 |
| hsa-mir-582    |  |  | 0.08389 | 1.392   | 0.19134 |
| hsa-mir-584    |  |  | 0.02842 | 0.69839 | 0.1638  |
| hsa-mir-623    |  |  | 0.03877 | 0.82447 | 0.0934  |
| hsa-mir-629    |  |  | 0.07803 | 0.81958 | 0.1129  |
| hsa-mir-630    |  |  | 0.30423 | 0.97363 | 0.02601 |
| hsa-mir-638    |  |  | 0.16088 | 0.95452 | 0.0332  |
| hsa-mir-663    |  |  | 0.08975 | 0.9233  | 0.04703 |
| hsa-mir-671    |  |  | 0.07737 | 0.92145 | 0.04632 |
| hsa-mir-7      |  |  | 0.25157 | 1.04076 | 0.03484 |
| hsa-mir-765    |  |  | 0.07292 | 0.92444 | 0.04381 |
| hsa-mir-769-3p |  |  | 0.07866 | 0.82608 | 0.10865 |
| hsa-mir-801    |  |  | 0.01038 | 0.9051  | 0.0389  |
| hsa-mir-9      |  |  | 0.01214 | 0.91466 | 0.03557 |
| hsa-mir-9*     |  |  | 0.01214 | 0.94183 | 0.03378 |
| hsa-mir-92     |  |  | 0.19118 | 0.93426 | 0.05203 |
| hsa-mir-92b    |  |  | 0.42488 | 1.03983 | 0.04894 |
| hsa-mir-96     |  |  | 0.08349 | 0.82521 | 0.111   |
| hsa-mir-98     |  |  | 0.46754 | 0.94952 | 0.0713  |
| hsa-mir-99a    |  |  | 0.82105 | 0.98896 | 0.0491  |
| hsa-mir-99b    |  |  | 0.4432  | 1.05575 | 0.07075 |

The *P* value from a univariate Cox regression model is shown, along with the exponential and standard error of the regression coefficient for individual microRNAs.

**Table S2. Neurodevelopment-related microRNAs.**

| <b>Wang WX <i>et al.</i> Biochim Biophys Acta. 2008, 1779:749-57.</b> |                      |                     |                     |
|-----------------------------------------------------------------------|----------------------|---------------------|---------------------|
| neuron signature                                                      | astrocyte signature  |                     |                     |
| miR-124b                                                              | miR-143              |                     |                     |
| miR-124a                                                              | mir-143a             |                     |                     |
| mir-128                                                               | miR-22               |                     |                     |
| let-7a                                                                | miR-27               |                     |                     |
|                                                                       | miR-193              |                     |                     |
|                                                                       | miR-23a              |                     |                     |
|                                                                       | miR-23b              |                     |                     |
|                                                                       | miR-24-1,2           |                     |                     |
|                                                                       | miR-29               |                     |                     |
|                                                                       | miR-221              |                     |                     |
|                                                                       | miR-21               |                     |                     |
| <b>Lau P <i>et al.</i> J Neurosci. 2008, 28:11720-30.</b>             |                      |                     |                     |
| oligo signature                                                       | pre-oligo signature  |                     |                     |
| miR-219                                                               | miR-9                |                     |                     |
| miR-145                                                               | miR-125b             |                     |                     |
| miR-23b                                                               | let-7c               |                     |                     |
| miR-146                                                               | miR-100              |                     |                     |
| miR-223                                                               | miR-99a              |                     |                     |
| miR-21                                                                | miR-130a             |                     |                     |
| miR-30a-5p                                                            | miR-25               |                     |                     |
| miR-17                                                                | miR-19b              |                     |                     |
| miR-191                                                               | miR-17               |                     |                     |
|                                                                       | miR-124a             |                     |                     |
| <b>Sempere LF <i>et al.</i> Genome Biol. 2004, 5:R13.</b>             |                      |                     |                     |
| neuron signature                                                      | pre-neuron signature |                     |                     |
| miR-125a                                                              | miR-125a             |                     |                     |
| miR-125b                                                              | miR-125b             |                     |                     |
| miR-9                                                                 | miR-9                |                     |                     |
| miR-9*                                                                | miR-9*               |                     |                     |
| miR-124b                                                              | miR-124a             |                     |                     |
| miR-124a                                                              | miR-124b             |                     |                     |
| let-7a                                                                | miR-92               |                     |                     |
| miR-100                                                               |                      |                     |                     |
| miR-98                                                                |                      |                     |                     |
| let-7b                                                                |                      |                     |                     |
| miR-155                                                               |                      |                     |                     |
| miR-218                                                               |                      |                     |                     |
| <b>Kapsimali M <i>et al.</i> Genome Biol. 2007, 8:R173.</b>           |                      |                     |                     |
| neuron signature                                                      | pre-oligo signature  | pre-neuro signature | pre-astro signature |
| miR-124                                                               | miR-92b              | miR-92b             | miR-92b             |
| miR-218a                                                              | miR-9                | let-7b              |                     |
| miR-181a                                                              | miR-124              | miR-124             |                     |
| miR-181b                                                              |                      | miR-9               |                     |
| miR-182                                                               |                      |                     |                     |
| miR-183                                                               |                      |                     |                     |
| miR-96                                                                |                      |                     |                     |
| miR-200a                                                              |                      |                     |                     |
| <b>Krichevsky AM <i>et al.</i> Stem Cells. 2006, 24:857-64.</b>       |                      |                     |                     |
| neuron signature                                                      | pre-oligo signature  | pre-neuro signature |                     |
| miR-143                                                               |                      | miR-143             |                     |
| miR-9*                                                                |                      | miR-19              |                     |
| miR-125b                                                              | miR-124a             | miR-124a            |                     |
| let-7b                                                                | miR-9                | miR-9               |                     |
| let-7d                                                                |                      |                     |                     |
| miR-135                                                               |                      |                     |                     |
| miR-181a                                                              |                      |                     |                     |
| miR-210                                                               |                      |                     |                     |
| miR-100                                                               |                      |                     |                     |
| let-7i                                                                |                      |                     |                     |
| <b>Smirnova L <i>et al.</i> Eur J Neurosci. 2005, 21:1469-77</b>      |                      |                     |                     |
| neuron signature                                                      | astrocyte signature  |                     |                     |

miR-124  
miR-125

miR-23  
miR-26  
miR-29

---

**Nielsen JA *et al.* BMC Neurosci. 2009; 10:98.**

---

| neural stem cell signature | pre-neuro signature |
|----------------------------|---------------------|
| miR-292-3p                 | miR-9               |
| miR-126                    | miR-125b            |
| miR-200c                   | miR-125a            |
| miR-20b                    | miR-181b            |
| miR-291-3p                 | miR-99a             |
| miR-20b*                   | miR-100             |
| miR-363-3p                 | miR-99b             |
| miR-199a                   | miR-181c            |
| miR-145                    | miR-218             |
| miR-183                    | miR-7               |
| miR-143                    | miR-124a            |
| miR-92                     |                     |
| miR-200b                   |                     |
| miR-19a                    |                     |
| miR-222                    |                     |
| miR-205                    |                     |
| miR-18                     |                     |
| miR-219                    |                     |
| miR-210                    |                     |
| miR-214                    |                     |
| miR-290                    |                     |

---

**Table S3. Mutation frequency of genes in glioblastoma subclasses**

| Gene           | Oligoneural<br>(n = 27) | Radial<br>glial (n =<br>22) | Neural (n<br>= 19) | Neuro-<br>mesenchymal<br>(n = 44) | Astrocytic<br>(n = 21) | Total (n =<br>133) |
|----------------|-------------------------|-----------------------------|--------------------|-----------------------------------|------------------------|--------------------|
| <i>TP53</i>    | 11                      | 3                           | 6                  | 9                                 | 11                     | 40                 |
| <i>PTEN</i>    | 5                       | 7                           | 6                  | 7                                 | 9                      | 34                 |
| <i>EGFR</i>    | 1                       | 8                           | 3                  | 5                                 | 3                      | 20                 |
| <i>NF1</i>     | 0                       | 1                           | 4                  | 7                                 | 4                      | 16                 |
| <i>RB1</i>     | 2                       | 0                           | 2                  | 0                                 | 6                      | 10                 |
| <i>PIK3R1</i>  | 5                       | 2                           | 0                  | 3                                 | 0                      | 10                 |
| <i>ERBB2</i>   | 2                       | 1                           | 1                  | 3                                 | 0                      | 7                  |
| <i>IDH1</i>    | 6                       | 0                           | 1                  | 0                                 | 0                      | 7                  |
| <i>PIK3CA</i>  | 1                       | 2                           | 1                  | 2                                 | 0                      | 6                  |
| <i>FKBP9</i>   | 1                       | 1                           | 0                  | 4                                 | 0                      | 6                  |
| <i>PIK3C2G</i> | 1                       | 2                           | 0                  | 0                                 | 1                      | 4                  |
| <i>PIK3CG</i>  | 1                       | 1                           | 1                  | 0                                 | 1                      | 4                  |
| <i>CHEK2</i>   | 2                       | 0                           | 1                  | 0                                 | 1                      | 4                  |
| <i>PRKDC</i>   | 0                       | 1                           | 0                  | 3                                 | 0                      | 4                  |
| <i>DST</i>     | 0                       | 3                           | 0                  | 0                                 | 0                      | 3                  |
| <i>FGFR1</i>   | 2                       | 0                           | 1                  | 0                                 | 0                      | 3                  |
| <i>BCL11A</i>  | 1                       | 0                           | 0                  | 1                                 | 1                      | 3                  |
| <i>GSTM5</i>   | 0                       | 0                           | 0                  | 2                                 | 1                      | 3                  |
| <i>PDGFRA</i>  | 1                       | 0                           | 1                  | 1                                 | 0                      | 3                  |
| <i>RHPN2</i>   | 1                       | 0                           | 0                  | 1                                 | 1                      | 3                  |
| <i>LUM</i>     | 0                       | 1                           | 0                  | 1                                 | 0                      | 2                  |
| <i>COL1A1</i>  | 1                       | 0                           | 0                  | 0                                 | 1                      | 2                  |
| <i>CYP27B1</i> | 1                       | 0                           | 0                  | 1                                 | 0                      | 2                  |

The number of cases with non-silent somatic mutations is shown as mutation frequency for each glioblastoma subclass. The top 23 most frequently mutated genes are shown. The study was limited to a total of 140 glioblastoma samples for which sequencing data was available, and the mutations occurring in the 7 hypermutator cases were excluded from this analysis. The sample number for each glioblastoma subclass is shown in parentheses at the top of each column. Significant genes (two-sided Fisher exact,  $P < 0.1$ ) are shaded.

**Table S4. Subclass-specific genomic alterations in glioblastoma.**

| <b>GBM class</b> | <b>Type</b> | <b>Coordinates (genes)</b>                                                                                                                                                                                                                                                                                                                                                                                                                                                                                                                                                                                                                                                                                                                                                                                                                                                                                                                                                                                                                                                                                                                                                                                                                                                                                                                                                                                                                                                                                                                                                                                                                                                                                                                                                                                                                                                                                                                                                                                                                                                                                                                                                                                                                                                                                                                                                                                                                                                                                                                                                                                                                                                                                                                                                                                                                                                                                                                                                                                                                                                                                                                                                                                                                                                                                                                   |
|------------------|-------------|----------------------------------------------------------------------------------------------------------------------------------------------------------------------------------------------------------------------------------------------------------------------------------------------------------------------------------------------------------------------------------------------------------------------------------------------------------------------------------------------------------------------------------------------------------------------------------------------------------------------------------------------------------------------------------------------------------------------------------------------------------------------------------------------------------------------------------------------------------------------------------------------------------------------------------------------------------------------------------------------------------------------------------------------------------------------------------------------------------------------------------------------------------------------------------------------------------------------------------------------------------------------------------------------------------------------------------------------------------------------------------------------------------------------------------------------------------------------------------------------------------------------------------------------------------------------------------------------------------------------------------------------------------------------------------------------------------------------------------------------------------------------------------------------------------------------------------------------------------------------------------------------------------------------------------------------------------------------------------------------------------------------------------------------------------------------------------------------------------------------------------------------------------------------------------------------------------------------------------------------------------------------------------------------------------------------------------------------------------------------------------------------------------------------------------------------------------------------------------------------------------------------------------------------------------------------------------------------------------------------------------------------------------------------------------------------------------------------------------------------------------------------------------------------------------------------------------------------------------------------------------------------------------------------------------------------------------------------------------------------------------------------------------------------------------------------------------------------------------------------------------------------------------------------------------------------------------------------------------------------------------------------------------------------------------------------------------------------|
| Oligoneural      | Amp         | chr1:143832901-144003054 (NOTCH2NL)<br>chr1:147386917-148002693<br>chr1:154454677-154762076 (PMF1, BGLAP, PAQR6, SMG5, TMEM79, C1orf85, VHLL, CCT3, C1orf61, MEF2D, C1orf182, RHBG, IQGAP3)<br>chr3:164101775-164101775<br>chr4:39131094-39168937 (RPL9, LIAS)<br>chr4:52383857-53524123 (DCUN1D4, SPATA18, LOC339977, SGCB, USP46, RASL11B, SCFD2)<br>chr4:69057734-69057734<br>chr4:190899522-190899522<br>chr5:786454-786454<br>chr6:32586130-32654431 (HLA-DRB5)<br>chr6:36408317-37029708 (C6orf89, ETV7, PXT1, KCTD20, STK38, SFRS3, CDKN1A, CPNE5, PPIL1, DKFZp779B1540)<br>chr6:41954740-42083351 (USP49, MED20, BYSL, CCND3)<br>chr6:42826226-42869372<br>chr6:44061202-44322873 (SLC29A1, MRPL14, TMEM63B, CAPN11, HSP90AB1, MGC45491)<br>chr6:47567276-48143862 (C6orf138, GPR115, OPN5, CD2AP, GPR111)<br>chr6:57468297-57583340 (PRIM2)<br>chr7:57650105-57650105<br>chr8:108857996-109243246 (RSPO2)<br>chr8:117807518-125483828 (SAMD12, TNFRSF11B, TAF2, FER1L6, EIF3H, C8orf53, RAD21, LOC441376, SLC30A8, MED30, EXT1, COLEC10, NOV, DCC1, DEPDC6, COL14A1, MRPL13, SNTB1, HAS2, ZHX2, DERL1, FAM83A, C8orf76, ZHX1, ATAD2, C8orf32, FBXO32, ANXA13, FAM91A1, ENPP2, MAL2, C8ORFK36, MTBP, WDR67, TMEM65)<br>chr8:126979808-143793103 (PHF20L1, FLJ43860, SLA, FAM135B, JRK, BAI1, FAM84B, MYC, FAM49B, DDEF1, ADCY8, KCNQ3, LRRC6, TMEM71, TG, WISP1, NDRG1, ST3GAL1, ZFAT1, KHDRBS3, COL22A1, KCNK9, CHRAC1, EIF2C2, PTK2, DENND3, GPR20, PTP4A3, TSNARE1, ARC, PSCA, LY6K, MLZE, OC90, SLC45A4, NIBP, KIAA0143)<br>chr9:140042631-140145682 (CACNA1B)<br>chr10:735709-5812743 (LARP5, GTPBP4, IDI2, IDI1, WDR37, ADARB2, PFKP, PITRM1, KLF6, AKR1C1, AKR1C2, AKR1C3, AKR1C4, UCN3, TUBAL3, CALML5, CALML3, ASB13, C10orf109, C10orf18, AKR1CL1, AKR1CL2, NET1)<br>chr10:6458556-29915507 (PRKCQ, SFMBT2, ITIH5, ITIH2, KIN, ATP5C1, FLJ45983, GATA3, C10orf47, UPF2, SEC61A2, NUDT5, CDC123, CAMK1D, CCDC3, OPTN, MCM10, C10orf49, PHYH, SEPHS1, FAM107B, ARMETL1, HSPA14, SUV39H2, DCLRE1C, OLAH, C10orf111, C10orf38, ITGA8, C10orf97, PTER, C1QL3, RSU1, VIM, ST8SIA6, PTPLA, STAM, MRC1L1, FAM23B, NSUN6, ARL5B, PLXDC2, NEBL, C10orf113, C10orf114, MLLT10, COMMD3, BMI1, SPAG6, C10orf67, ARHGAP21, PRTFDC1, C10orf63, GAD2, APBB1IP, PDSS1, ABI1, YME1L1, MASTL, RAB18, MKX, ARMC4, WAC, BAMBI, LYZL1, ARMC3, FAM23A, SVIL, CACNB2, CUGBP2, DHTKD1, MYO3A, C10orf30, MPP7, TAF3, KIAA1217, PTCHD3, MEIG1, CUBN, ACBD5, USP6NL, SLC39A12, NMT2, MRC1, C10orf140, FRMD4A, TRDMT1, DNAJC1, PTF1A, RPP38, ACBD7, PRPF18, MSRB2, ECHDC3, THNSL1, GPR158, ANKRD26, PIP4K2A)<br>chr12:2326791-2371642 (CACNA1C)<br>chr12:50667209-51630592 (KRT3, KRT75, KRT85, C12orf44, KRT6B, ACVR1B, NR4A1, KRT7, KRT81, KRT83, KRT82, KRT71, KRT72, KRT73, KRT2, KRT77, KRT79, KRT78, KRT8, KRT18, KRT1, GRASP, KRT5, KRT76, KRT86, KRT6A, KRT80, KRT74, KRT84, KRT4, KRT6C)<br>chr12:52640271-52749265 (HOXC11, HOXC10, HOXC9, HOXC8, HOXC5, HOXC6, HOXC4)<br>chr12:53468470-54075488 (KIAA0748, MUCL1, OR9K2, OR10A7, OR6C74, OR6C6, OR6C1, OR6C3, OR6C75, NEUROD4)<br>chr12:55520173-55962880 (NXPH4, SDR-O, ADMR, ZBTB39, TAC3, MYO1A, KIAA0286, STAT6, SHMT2, NDUFA4L2, STAC3, R3HDM2, NAB2, LRP1, RDH16)<br>chr12:56765442-56765442<br>chr12:58485532-58591160<br>chr12:64187507-64187507<br>chr12:68751182-68975957 (CNOT2) |

chr15:18741715-18752130  
chr15:19537034-20079934 (OR4M2, OR4N4, LOC650137)  
chr16:69417986-69423956  
chr20:28266112-28266112  
chr21:10062377-10062377 (BAGE2, BAGE4, BAGE3, BAGE5)

---

Del chr5:75148-725941 (AHRR, PDCD6, KIAA1909, LOC116349, CCDC127, EXOC3, SLC9A3, TPPP, CEP72, LOC389257, SDHA)  
chr5:24702254-24943772  
chr5:165192475-166161433  
chr11:192957-46538637 (SAA1, SBF2, TNNT3, CTR9, GYLTL1B, ZNF214, PHF21A, CYB5R2, DCDC1, HSD17B12, UBQLNL, RIC8A, SIRT3, PSMD13, NLRP6, IFITM5, B4GALNT4, PKP3, SIGIRR, PTDSS2, RNH1, HRAS, C11orf35, RASSF7, KIAA1542, SCT, DRD4, DEAF1, EPS8L2, TALDO1, SLC25A22, LRDD, RPLP2, PNPLA2, CD151, POLR2L, TSPAN4, CHID1, AP2A2, TOLLIP, KRTAP5-1, KRTAP5-2, KRTAP5-4, KRTAP5-6, CTSD, TNNT2, LSP1, MRPL23, TH, ASCL2, TSPAN32, CD81, TSSC4, TRPM5, KCNQ1, CDKN1C, SLC22A18, PHLDA2, NAP1L4, CARS, OSBPL5, ART5, ART1, CHRNA10, NUP98, FRAG1, STIM1, TRIM21, OR52K2, OR52K1, OR52M1, C11orf40, OR52I2, OR52I1, TRIM68, OR51D1, OR51E1, OR51E2, OR51F1, OR51F2, OR51S1, OR51T1, OR51A7, OR51G2, OR51G1, OR51A4, OR51A2, MMP26, OR51L1, OR52E2, OR52A4, OR52A5, HBB, HBD, HBG1, HBG2, HBE1, OR51B4, OR51B5, OR51B6, OR51M1, OR51Q1, OR51I1, OR51I2, OR52D1, UBQLN3, OR52H1, TRIM6, TRIM6-TRIM34, TRIM34, TRIM5, OR56B1, OR52N4, OR52N5, OR52N1, OR52N2, OR52E6, OR52E8, OR52E4, OR52L1, OR56A1, OR56B4, OR52B2, OR52W1, C11orf42, CNGA4, CCKBR, PRKCDBP, SMPD1, APBB1, HPX, TRIM3, ARFIP2, BET1L, C11orf47, DNHD1, KIAA0409, ILK, TAF10, DCHS1, MRPL17, OR2AG2, OR2AG1, OR6A2, OR10A5, OR10A2, OR10A4, OR2D2, OR2D3, NLRP14, SYT9, OLFML1, PPFIBP2, OR5P2, OR5P3, OR10A6, OR10A3, NLRP10, EIF3F, TUB, RIC3, LMO1, STK33, RPL27A, ST5, ASCL3, TMEM9B, NRIP3, SCUBE2, RAB6IP1, TMEM41B, IPO7, WEE1, ADM, AMPD3, RNF141, GALNTL4, USP47, DKK3, MICAL2, ARNTL, PTH, MLSTD2, COPB1, PSMA1, PDE3B, CYP2R1, CALCA, CALCB, SOX6, PLEKHAT7, RPS13, PIK3C2A, KCNJ11, USH1C, MYOD1, SERGEF, TPH1, MRGPRX3, MRGPRX4, SAA4, SAA2, HPS5, GTF2H1, LDHA, LDHC, LDHAL6A, TSG101, SPTY2D1, TMEM86A, MRGPRX2, ZDHHC13, CSRP3, E2F8, NAV2, DBX1, ZNF215, NELL1, TMEM16E, SLC17A6, FANCF, GAS2, LUZP2, MUC15, SLC5A12, LOC387758, CCDC34, LGR4, LIN7C, BDNF, METT5D1, KCNA4, FSHB, C11orf46, MPPED2, CCDC5, DPH4, IMMP1L, PAX6, RCN1, WT1, WIT1, EIF3M, CCDC73, PRRG4, TCP11L1, CSTF3, CD59, FBXO3, LMO2, CAPRIN1, NAT10, ABTB2, CAT, ELF5, EHF, APIP, PDHX, CD44, TRIM22, DKFZP586H2123, FJX1, TRIM44, LDLRAD3, TRAF6, RAG1, C11orf74, LRRC4C, API5, EXT2, ALX4, CD82, TSPAN18, PRDM11, SYT13, SLC35C1, MAPK8IP1, PEX16, DEPDC7, DGKZ, MDK, CHRM4, FLJ20294, ATHL1, PRMT3, PTPN5, IGF2, MRV1, OR56A3, KRTAP5-5, HIPK3, IRF7, TPP1, ABCC8, INSC, OR51B2, OR52B4, OR56A4, SWAP70, MUC2, HTATIP2, MUC6, MUPCDH, C11orf56, C11orf16, ALKBH3, CRY2, RHOG, UEVLD, HCCA2, LOC644943, NUCB2, EIF4G2, IFITM2, TMEM80, TMEM16C, FLJ14213, CHST1, RRAS2, MICALCL, MRGPRE, BTBD10, SPON1, CREB3L1, RBMXL2, C11orf41, KCNC1, LOC143678, OR51V1, OR52B6, OVCH2, IGSF22, SLC6A5, PARVA, TEAD1, BRSK2, FXC1, TTC17, IGF2AS, C11orf55, OR52R1, IFITM3, KIF18A, CEND1, ZNF195, ZNF143, LRRC56, INS, RRM1, ELP4, KRTAP5-3, DUSP8, SYT8, SLC1A2, RAG2, SAAL1, BBOX1, QSER1, TP53I11, LYVE1, C11orf58, PHACS, INS-IGF2, PDDC1, SVIP, OR52A1, C11orf17, MRGPRX1, TMEM16J, LOC390110, IFITM1, EFCAB4A, MUC5B, COMMD9, OR52J3)  
chr11:121944923-134432264 (ACAD8, CHEK1, KCNJ1, STS-1, CRTAM, C11orf63, HSPA8, ASAM, ZNF202, OR6X1, OR6M1, PMP22CD, OR8D4, OR4D5, OR6T1, OR10S1, OR10G4, OR10G9, OR10G8, OR10G7, LOH11CR2A, OR8G2, OR8G1, OR8G5, OR8D1, OR8D2, OR8B2, OR8B3, OR8B4, OR8B8, OR8B12, OR8A1, PANX3, TBRG1, SIAE, SPA17, NRG1, VSIG2, C11orf61, ROBO3, ROBO4, SLC37A2, FEZ1, EI24, STT3A, ACRV1, PATE, C11orf38, HYLS1, PUS3, DDX25, RPUSD4, SRPR, FOXRED1, TIRAP, DCPS, ST3GAL4, KIRREL3, ETS1, FLI1, KCNJ5, C11orf45, P53AIP1, RICS, NFRKB, PRDM10, APLP2, ST14, BSX, ADAMTS15, SNX19, HNT, OPCML, SPATA19, JAM3, NCAPD3, VPS26B, THYN1, LOC89944, B3GAT1, CDON, ESAM, FAM118B, BARX2, ADAMTS8, SCN3B, HEPN1, HEPACAM, CCDC15, LOC219854, GLB1L3, TMEM45B, PKNOX2, ZBTB44, IGSF9B, GRAMD1B)  
chr12:66312545-66343836 (DYRK2)  
chr15:18362554-18454049  
chr15:20316991-32511474 (SLC12A6, HERC2, MTMR10, PGBD4, GABRG3, FMN1,



RYR3, CYFIP1, NIPA2, NIPA1, GOLGA8E, MKRN3, NDN, SNRPN, SNURF, UBE3A, ATP10A, GABRB3, GABRA5, GOLGA8G, FLJ32679, APBA2, NDNL2, TJP1, CHRFAM7A, MTMR15, KLF13, OTUD7A, CHRNA7, ARHGAP11A, GREM1, AVEN, CHRM5, C15orf24, C15orf29, TMEM85, NOLA3, NUT, AGPAT7, GOLGA8A, SCG5, TRPM1, C15orf2, TUBGCP5, OCA2, ARHGAP11B, MAGEL2)

chr15:36871682-41112019 (FSIP1, CCDC32, PLA2G4B, SPTBN5, CAPN3, TTBK2, CASC5, FLJ39531, THBS1, GPR176, EIF2AK4, BMF, BUB1B, PAK6, DISP2, C15orf23, IVD, CHST14, RPUSD2, FAM82C, GCHFR, DNAJC17, PPP1R14D, SPINT1, RHOV, VPS18, DLL4, CHAC1, INOC1, EXDL1, OIP5, NUSAP1, NDUFAF1, RTF1, ITPKA, LTK, RPAP1, TYRO3, MAPKBP1, EHD4, PLA2G4F, VPS39, TMEM87A, GANC, ZFP106, SNAP23, LRRC57, CEP27, CDAN1, UBR1, PLCB2, ZFYVE19, C15orf52, PLA2G4D, BAHD1, RAD51, CHP, FLJ38596, MGA, PLA2G4E, SRP14)

chr15:41776052-49479760 (GLDN, SPPL2A, CTDSPL2, C15orf33, GATM, CKMT1A, PDIA3, ELL3, SERINC4, HYPK, MFAP1, WDR76, CASC4, EIF3J, B2M, TRIM69, C15orf43, DUOXA1, DUOX1, SPATA5L1, C15orf48, SLC30A4, C15orf21, PLDN, SQRDL, SEMA6D, SLC24A5, DUT, SHC4, EID1, KIAA0256, GALK2, FGF7, FAM8B4, SLC27A2, GABPB2, USP8, AP4E1, TNFAIP8L3, CYP19A1, SORD, SLC12A1, COPS2, CEP152, FRMD5, DTWD1, DUOXA2, SERF2, SLC28A2, SHF, TRPM7, MYEF2, USP50, DUOX2, FBN1, HDC, SPG11)

chr15:50521219-50631642 (ARPP-19, MYO5A)

chr15:52533226-59327182 (RFXDC2, PIGB, C15orf15, RAB27A, CCPG1, DYX1C1, PYGO1, PRTG, NEDD4, TEX9, MNS1, SUHW4, TCF12, CGNL1, Gcom1, GRINL1A, ALDH1A2, LIPC, ADAM10, SLTM, RNF111, CCNB2, MYO1E, LDHAL6B, FAM81A, GCNT3, GTF2A2, BNIP2, ANXA2, NARG2, RORA, AQP9, FAM63B, FOXB1, UNC13C)

chr15:71515922-73540322 (ARID3B, CYP11A1, NPTN, CD276, LOC388135, TBC1D21, LOXL1, STOML1, PML, GOLGA6, ISLR2, ISLR, STRA6, UBL7, CLK3, EDC3, CYP1A1, CYP1A2, CSK, LMAN1L, CPLX3, SCAMP2, MPI, COX5A, SCAMP5, PPCDC, COMMD4, NEIL1, MAN2C1, SIN3A, C15orf39, C15orf17, SEMA7A, RPP25, CCDC33, LOC283677, ULK3)

chr15:75298293-76951824 (PSMA4, LOC123688, IREB2, ADAMTS7, SGK269, HMG20A, LINGO1, TBC1D2B, CIB2, IDH3A, ACSBG1, DNAJA4, WDR61, CRABP1, CHRNA5, CHRNA3, CHRNB4)

chr15:78481126-80231768 (ARNT2, KIAA1199, MESDC2, MESDC1, STARD5, MEX3B, IL16, C15orf26, FAM108C1, EFTUD1, TMC3)

chr15:81496906-83408660 (BNC1, BTBD1, HDGFRP3, SH3GL3, ZSCAN2, NMB, SEC11A, SLC28A1, PDE8A, ALPK3, TM6SF1, ADAMTSL3, WDR73, ZNF592)

chr15:91750531-91777912

chr15:92377240-94389111 (MCTP2)

chr19:47952688-48449547 (PSG6, PSG8, PSG1, PSG7, PSG11, PSG5, PSG4, PSG2, PSG9)

chr19:61031766-63492214 (GALP, ZNF417, ZNF552, ZNF419, ZNF749, ZNF787, NLRP4, NLRP8, ZNF444, ZSCAN5, ZNF582, ZNF583, ZNF667, ZFP28, ZNF71, BC37295\_3, ZIM2, PEG3, USP29, ZIM3, DUXA, AURKC, ZNF543, ZNF304, ZNF547, ZNF548, VN1R1, ZNF772, ZNF773, ZNF549, ZNF550, ZNF416, ZIK1, ZNF530, ZNF211, ZSCAN4, ZNF551, ZNF671, ZNF776, ZNF587, ZNF418, ZNF256, ZNF606, ZNF135, ZSCAN18, ZNF329, ZNF274, ZNF8, ZNF544, NLRP5, ZNF470, C19orf18, ZNF586, NLRP13, ZNF17, NLRP11, ZNF460, ZNF134, ZSCAN1, ZNF264, LOC342933, ZNF154, ZNF471)

---

Radial glial

Amp

chr1:16964266-16964266

chr1:143832901-144003054 (NOTCH2NL)

chr1:238967344-241494130 (FH, KMO, OPN3, EXO1, MAP1LC3C, PLD5, CEP170, SDCCAG8, RGS7, CHML, WDR64)

chr2:90982929-91435968

chr2:94892169-94892169

chr3:179287256-182340788 (ACTL6A, GNB4, KCNMB2, ZMAT3, PIK3CA, KCNMB3, ZNF639, MFN1, MRPL47, NDUFB5, USP13, PEX5L, FXR1, DNAJC19, TTC14)

chr3:182889728-183652765 (SOX2)

chr3:185918731-187248733 (VPS8, LOC285382, EHHADH, MAP3K13, TMEM41A, LIPH, SENP2, IGF2BP2, SFRS10, ETV5, C3orf65)

chr4:69057734-69057734

chr4:190780238-190907864

chr6:57377958-57648020 (PRIM2)

chr7:54673961-54839437 (SEC61G)

chr7:57629889-57668499

chr7:127884251-127884251 (HIG2)

---

|                      |     |                                                                                                                                                                                                                                                                                                                                                                                                                                                                                                                                                                                                                                                                                                                                                                                                                                                                                                                                                                                                                                                                                                                                                                                       |
|----------------------|-----|---------------------------------------------------------------------------------------------------------------------------------------------------------------------------------------------------------------------------------------------------------------------------------------------------------------------------------------------------------------------------------------------------------------------------------------------------------------------------------------------------------------------------------------------------------------------------------------------------------------------------------------------------------------------------------------------------------------------------------------------------------------------------------------------------------------------------------------------------------------------------------------------------------------------------------------------------------------------------------------------------------------------------------------------------------------------------------------------------------------------------------------------------------------------------------------|
|                      |     | chr7:143705424-143705424 (ARHGGEF5)                                                                                                                                                                                                                                                                                                                                                                                                                                                                                                                                                                                                                                                                                                                                                                                                                                                                                                                                                                                                                                                                                                                                                   |
|                      |     | chr9:134572632-135109698 (GBGT1, CEL, C9orf98, C9orf9, TSC1, RALGDS, OBP2B, GF11B, GTF3C5)                                                                                                                                                                                                                                                                                                                                                                                                                                                                                                                                                                                                                                                                                                                                                                                                                                                                                                                                                                                                                                                                                            |
|                      |     | chr12:61001540-61154818 (USP15, MON2)                                                                                                                                                                                                                                                                                                                                                                                                                                                                                                                                                                                                                                                                                                                                                                                                                                                                                                                                                                                                                                                                                                                                                 |
|                      |     | chr12:61699723-61874934 (AVPR1A)                                                                                                                                                                                                                                                                                                                                                                                                                                                                                                                                                                                                                                                                                                                                                                                                                                                                                                                                                                                                                                                                                                                                                      |
|                      |     | chr14:21529815-22046096                                                                                                                                                                                                                                                                                                                                                                                                                                                                                                                                                                                                                                                                                                                                                                                                                                                                                                                                                                                                                                                                                                                                                               |
|                      |     | chr14:104059563-104509602 (PLD4, AHNAK2, LOC400258, TMEM179, C14orf151, ADSSL1, AKT1, KIAA0284, SIVA1, C14orf173)                                                                                                                                                                                                                                                                                                                                                                                                                                                                                                                                                                                                                                                                                                                                                                                                                                                                                                                                                                                                                                                                     |
|                      |     | chr15:18884435-18884435 (LOC283755)                                                                                                                                                                                                                                                                                                                                                                                                                                                                                                                                                                                                                                                                                                                                                                                                                                                                                                                                                                                                                                                                                                                                                   |
|                      |     | chr15:19537034-20079934 (OR4M2, OR4N4, LOC650137)                                                                                                                                                                                                                                                                                                                                                                                                                                                                                                                                                                                                                                                                                                                                                                                                                                                                                                                                                                                                                                                                                                                                     |
|                      |     | chr16:32512851-32553401                                                                                                                                                                                                                                                                                                                                                                                                                                                                                                                                                                                                                                                                                                                                                                                                                                                                                                                                                                                                                                                                                                                                                               |
|                      |     | chr17:41577519-41577519 (KIAA1267)                                                                                                                                                                                                                                                                                                                                                                                                                                                                                                                                                                                                                                                                                                                                                                                                                                                                                                                                                                                                                                                                                                                                                    |
|                      |     | chr19:39110460-39110460                                                                                                                                                                                                                                                                                                                                                                                                                                                                                                                                                                                                                                                                                                                                                                                                                                                                                                                                                                                                                                                                                                                                                               |
|                      |     | chr19:48433090-48562609 (CD177, PSG9)                                                                                                                                                                                                                                                                                                                                                                                                                                                                                                                                                                                                                                                                                                                                                                                                                                                                                                                                                                                                                                                                                                                                                 |
|                      |     | chr19:55941448-60623758 (ZNF808, SIGLEC7, GP6, ZNF761, ZNF331, EPS8L1, ZNF677, TFPT, COX6B2, KIR2DS4, NDUFA3, FLJ16287, VN1R2, LILRA6, SIGLEC8, KLK5, KIR3DL3, KIR3DX1, SAPS1, PPP1R12C, LILRB1, KIR3DL2, KIR2DL1, CD33, GPR32, ACPT, C19orf48, KLK1, KLK15, KLK3, KLK2, KLK4, KLK6, KLK7, KLK8, KLK9, KLK11, KLK12, KLK13, ATPBD3, SIGLEC9, FLJ40235, ETFB, CLDND2, NKG7, LIM2, SIGLEC12, SIGLEC6, ZNF175, SIGLEC5, HAS1, FPR1, FPRL1, FPRL2, ZNF577, ZNF649, ZNF613, ZNF350, ZNF615, ZNF614, ZNF432, ZNF616, PPP2R1A, ZNF766, ZNF480, ZNF610, ZNF528, ZNF701, ZNF83, ZNF611, ZNF28, ZNF468, ZNF320, ZNF321, ZNF816A, ZNF160, ZNF415, ZNF347, VN1R4, BIRC8, DPRX, NLRP12, MYADM, PRKCG, CACNG7, CACNG8, CACNG6, OSCAR, PRPF31, CNOT3, LENG1, TMC4, LENG4, RPS9, LILRA3, LILRA5, LILRA4, TTYH1, LENG8, LENG9, CDC42EP5, LAIR2, LILRA2, LILRA1, KIR3DP1, KIR2DL3, FCAR, NCR1, NLRP7, RDH13, TNNT1, C19orf51, PTPRH, TMEM86B, TNNI3, BRSK1, SUV420H2, IL11, TMEM190, RPL28, LILRB5, LILRB4, ZNF600, LILRB2, LILRB3, LAIR1, SIGLEC10, ZNF765, LOC284417, HSPBP1, UBE2S, SIGLEC14, SYT5, ZNF578, TSEN34, VSTM1, NLRP2, ZNF665, KIR3DL1, ZNF137, KLK10, KLK14, ZNF813, LOC729767, KIR2DL4) |
|                      |     | chr20:25680494-26156025                                                                                                                                                                                                                                                                                                                                                                                                                                                                                                                                                                                                                                                                                                                                                                                                                                                                                                                                                                                                                                                                                                                                                               |
|                      |     | chr20:28080969-28266112                                                                                                                                                                                                                                                                                                                                                                                                                                                                                                                                                                                                                                                                                                                                                                                                                                                                                                                                                                                                                                                                                                                                                               |
|                      | Del | chr1:3009360-4138999 (PRDM16, ARHGGEF16, FAM79A, WDR8, TP73, CCDC27, LRRC47, DFFB, C1orf174, MEGF6, KIAA0495, KIAA0562)                                                                                                                                                                                                                                                                                                                                                                                                                                                                                                                                                                                                                                                                                                                                                                                                                                                                                                                                                                                                                                                               |
|                      |     | chr6:112536987-112593029 (LAMA4)                                                                                                                                                                                                                                                                                                                                                                                                                                                                                                                                                                                                                                                                                                                                                                                                                                                                                                                                                                                                                                                                                                                                                      |
| Neural               | Amp | chr1:143832901-143832901                                                                                                                                                                                                                                                                                                                                                                                                                                                                                                                                                                                                                                                                                                                                                                                                                                                                                                                                                                                                                                                                                                                                                              |
|                      |     | chr1:200264248-201057463 (ARL8A, PTPN7, LGR6, PPP1R12B, SYT2, JARID1B, UBE2T, GPR37L1)                                                                                                                                                                                                                                                                                                                                                                                                                                                                                                                                                                                                                                                                                                                                                                                                                                                                                                                                                                                                                                                                                                |
|                      |     | chr2:89895565-89895565                                                                                                                                                                                                                                                                                                                                                                                                                                                                                                                                                                                                                                                                                                                                                                                                                                                                                                                                                                                                                                                                                                                                                                |
|                      |     | chr3:25625771-25658840 (TOP2B)                                                                                                                                                                                                                                                                                                                                                                                                                                                                                                                                                                                                                                                                                                                                                                                                                                                                                                                                                                                                                                                                                                                                                        |
|                      |     | chr3:164101775-164101775                                                                                                                                                                                                                                                                                                                                                                                                                                                                                                                                                                                                                                                                                                                                                                                                                                                                                                                                                                                                                                                                                                                                                              |
|                      |     | chr3:196933316-196933316                                                                                                                                                                                                                                                                                                                                                                                                                                                                                                                                                                                                                                                                                                                                                                                                                                                                                                                                                                                                                                                                                                                                                              |
|                      |     | chr5:848743-848743 (ZDHHC11)                                                                                                                                                                                                                                                                                                                                                                                                                                                                                                                                                                                                                                                                                                                                                                                                                                                                                                                                                                                                                                                                                                                                                          |
|                      |     | chr6:314419-314419                                                                                                                                                                                                                                                                                                                                                                                                                                                                                                                                                                                                                                                                                                                                                                                                                                                                                                                                                                                                                                                                                                                                                                    |
|                      |     | chr6:57583340-57648020 (PRIM2)                                                                                                                                                                                                                                                                                                                                                                                                                                                                                                                                                                                                                                                                                                                                                                                                                                                                                                                                                                                                                                                                                                                                                        |
|                      |     | chr6:65075924-65983561                                                                                                                                                                                                                                                                                                                                                                                                                                                                                                                                                                                                                                                                                                                                                                                                                                                                                                                                                                                                                                                                                                                                                                |
|                      |     | chr6:66553013-67178674                                                                                                                                                                                                                                                                                                                                                                                                                                                                                                                                                                                                                                                                                                                                                                                                                                                                                                                                                                                                                                                                                                                                                                |
|                      |     | chr7:54705681-54705681                                                                                                                                                                                                                                                                                                                                                                                                                                                                                                                                                                                                                                                                                                                                                                                                                                                                                                                                                                                                                                                                                                                                                                |
|                      |     | chr7:55349636-55383641                                                                                                                                                                                                                                                                                                                                                                                                                                                                                                                                                                                                                                                                                                                                                                                                                                                                                                                                                                                                                                                                                                                                                                |
|                      |     | chr7:57650105-57650105                                                                                                                                                                                                                                                                                                                                                                                                                                                                                                                                                                                                                                                                                                                                                                                                                                                                                                                                                                                                                                                                                                                                                                |
|                      |     | chr7:61469274-61469274                                                                                                                                                                                                                                                                                                                                                                                                                                                                                                                                                                                                                                                                                                                                                                                                                                                                                                                                                                                                                                                                                                                                                                |
|                      |     | chr7:128069356-128069356                                                                                                                                                                                                                                                                                                                                                                                                                                                                                                                                                                                                                                                                                                                                                                                                                                                                                                                                                                                                                                                                                                                                                              |
|                      |     | chr7:141438503-141438503 (MGAM)                                                                                                                                                                                                                                                                                                                                                                                                                                                                                                                                                                                                                                                                                                                                                                                                                                                                                                                                                                                                                                                                                                                                                       |
|                      |     | chr8:39505255-39505255                                                                                                                                                                                                                                                                                                                                                                                                                                                                                                                                                                                                                                                                                                                                                                                                                                                                                                                                                                                                                                                                                                                                                                |
|                      |     | chr12:61942895-62402775 (DPY19L2)                                                                                                                                                                                                                                                                                                                                                                                                                                                                                                                                                                                                                                                                                                                                                                                                                                                                                                                                                                                                                                                                                                                                                     |
|                      |     | chr12:69855883-70779251 (LGR5, CCDC131, TMEM19, TBC1D15, TPH2, THAP2, RAB21)                                                                                                                                                                                                                                                                                                                                                                                                                                                                                                                                                                                                                                                                                                                                                                                                                                                                                                                                                                                                                                                                                                          |
|                      |     | chr12:71395861-71553628                                                                                                                                                                                                                                                                                                                                                                                                                                                                                                                                                                                                                                                                                                                                                                                                                                                                                                                                                                                                                                                                                                                                                               |
|                      |     | chr15:18741715-18752130                                                                                                                                                                                                                                                                                                                                                                                                                                                                                                                                                                                                                                                                                                                                                                                                                                                                                                                                                                                                                                                                                                                                                               |
|                      |     | chr15:19786654-19786654                                                                                                                                                                                                                                                                                                                                                                                                                                                                                                                                                                                                                                                                                                                                                                                                                                                                                                                                                                                                                                                                                                                                                               |
|                      |     | chr20:26156025-26156025                                                                                                                                                                                                                                                                                                                                                                                                                                                                                                                                                                                                                                                                                                                                                                                                                                                                                                                                                                                                                                                                                                                                                               |
|                      | Del | chr8:137802110-137919307                                                                                                                                                                                                                                                                                                                                                                                                                                                                                                                                                                                                                                                                                                                                                                                                                                                                                                                                                                                                                                                                                                                                                              |
|                      |     | chr15:18683109-18683109                                                                                                                                                                                                                                                                                                                                                                                                                                                                                                                                                                                                                                                                                                                                                                                                                                                                                                                                                                                                                                                                                                                                                               |
|                      |     | chr16:21482408-21501072                                                                                                                                                                                                                                                                                                                                                                                                                                                                                                                                                                                                                                                                                                                                                                                                                                                                                                                                                                                                                                                                                                                                                               |
| Neuromesenchymal Amp |     | chr1:16666759-16678604                                                                                                                                                                                                                                                                                                                                                                                                                                                                                                                                                                                                                                                                                                                                                                                                                                                                                                                                                                                                                                                                                                                                                                |

chr1:103909052-103965273 (AMY2B, AMY2A)  
 chr1:120826825-120826825  
 chr1:143658180-144003054 (NOTCH2NL, SEC22B)  
 chr1:147499045-147946904  
 chr1:199137130-199517897 (C1orf106, KIF21B, TMEM9, CACNA1S, DKFZp434B1231)  
 chr2:90982929-90982929  
 chr2:94892169-94892169  
 chr3:164101775-164101775  
 chr3:196911054-196958466 (MUC20)  
 chr4:9296945-9410428 (DRD5)  
 chr5:848743-848743 (ZDHHC11)  
 chr6:252938-314419 (DUSP22)  
 chr6:57468297-57648020 (PRIM2)  
 chr7:54673961-54839437 (SEC61G)  
 chr7:55349636-55680712 (ECOP, LANCL2)  
 chr7:57629889-57668499  
 chr7:61469274-61469274  
 chr7:128069356-128069356  
 chr7:141408012-141408012 (MGAM)  
 chr9:41970427-41970427  
 chr9:44199400-44199400  
 chr9:44810116-44810116  
 chr9:69214231-69214231  
 chr9:79301133-79504123 (GNA14)  
 chr9:85770106-85791620 (HNRPK, RMI1)  
 chr9:101725072-101888212 (STX17, TXNDC4)  
 chr9:103199829-103253408 (MRPL50, ZNF189, ALDOB)  
 chr11:23401583-23725984  
 chr11:26737076-26886053  
 chr11:31357671-31613026 (DPH4, IMMP1L, ELP4)  
 chr11:32395675-32464668 (WT1, WIT1)  
 chr12:38537104-38570141 (SLC2A13)  
 chr12:42467345-42507136 (IRAK4, TWF1)  
 chr12:44755744-44909594 (SLC38A1)  
 chr12:56765442-56765442  
 chr12:86964661-87092571 (C12orf29, CEP290, TMTC3)  
 chr15:18741715-18884435 (LOC283755)  
 chr15:19537034-20079934 (OR4M2, OR4N4, LOC650137)  
 chr16:33495500-33495500  
 chr19:48433090-48562609 (CD177, PSG9)  
 chr20:25680494-26156025  
 chr20:28080969-28266112  
 chr21:10022305-10022305

---

Del chr1:5390816-5390816  
 chr1:6442188-7484427 (TNFRSF25, PLEKHG5, NOL9, TAS1R1, ZBTB48, KLHL21, PHF13, THAP3, CAMTA1, ESPN, DNAJC11)  
 chr1:147307636-147475853  
 chr3:196958466-196958466  
 chr4:13319160-13359520  
 chr4:185471347-186082412 (CASP3, CCDC111, MLF1IP, ACSL1, IRF2)  
 chr4:186737676-188492119 (F11, SORBS2, TLR3, CYP4V2, KLKB1, MTNR1A, FAT, DKFZP564J102)  
 chr16:31974467-32553401  
 chr16:33495500-33517366

---

|            |     |                                                                                                                                                                                                                                                                                                                                                                                          |
|------------|-----|------------------------------------------------------------------------------------------------------------------------------------------------------------------------------------------------------------------------------------------------------------------------------------------------------------------------------------------------------------------------------------------|
| Astrocytic | Amp | chr1:16666759-17148591 (CROCC, NBPF1)<br>chr1:86944804-87201107 (SEP15, HS2ST1, SH3GLB1)<br>chr1:110323227-110416530 (AHCYL1, FAM40A, ALX3)<br>chr1:120303591-120331192 (NOTCH2)<br>chr1:144003054-144003054<br>chr1:153456191-153472127 (GBA)<br>chr2:14365595-16976772 (FAM49A, FAM84A, NAG, DDX1, MYCN)<br>chr2:89895565-89895565<br>chr2:90982929-90982929<br>chr2:94892169-94892169 |
|------------|-----|------------------------------------------------------------------------------------------------------------------------------------------------------------------------------------------------------------------------------------------------------------------------------------------------------------------------------------------------------------------------------------------|

---

chr2:132489752-132778588  
 chr3:75653843-75945889  
 chr3:121595871-121611051 (FSTL1)  
 chr3:196904348-196958466 (MUC20)  
 chr4:3873352-4246909 (OTOP1)  
 chr4:9296945-9296945  
 chr4:69057734-69057734  
 chr4:190907864-190907864  
 chr5:763493-873415 (ZDHHC11)  
 chr6:57468297-57683388 (PRIM2)  
 chr7:54705681-54705681  
 chr7:55349636-55383641  
 chr7:57650105-57650105  
 chr7:61469274-61469274  
 chr7:133414696-133414696  
 chr7:141408012-141408012 (MGAM)  
 chr8:39356594-39356594  
 chr10:38682264-42150758  
 chr12:55276694-55323470 (ATP5B, BAZ2A)  
 chr12:58891104-58989664  
 chr12:80008507-80146557 (FLJ21963)  
 chr12:109940482-109986039 (CUTL2)  
 chr15:18741715-18884435 (LOC283755)  
 chr15:19786654-20079934 (OR4M2, OR4N4, LOC650137)  
 chr16:33495500-33495500  
 chr18:14210765-14567615  
 chr19:48433090-48433090  
 chr20:25821064-26156025  
 chr20:28080969-28080969  
 chr21:10022305-10022305  
 chr22:22720194-22720194

---

Del chr3:117396297-117492665 (LSAMP)  
 chr3:152996120-153028962 (AADAC)  
 chr4:70184189-70184189 (UGT2B28)  
 chr6:29962848-30010233  
 chr6:32732763-32738442 (HLA-DQB1)  
 chr6:71156045-95726037 (LYRM2, SRP35, SNX14, FAM46A, C6orf150, C6orf162, ANKRD6, SMAP1, SENP6, RING1B, KIAA1009, COL12A1, ME1, RRAGD, SLC35A1, RIMS1, FAM135A, C6orf57, OGFRL1, KCNQ5, DPPA5, ECAT1, DDX43, MTO1, EEF1A1, SLC17A5, COX7A2, TMEM30A, FILIP1, IMPG1, HTR1B, IRAK1BP1, PHIP, HMGN3, LCA5, ELOVL4, TTK, BCKDHB, IBTK, TPBG, C6orf157, DOPEY1, PGM3, PRSS35, SNAP91, C6orf159, CYB5R4, NT5E, SYNCRIP, HTR1E, CGA, GJB7, C6orf165, RARS2, ORC3L, C6orf166, SPACA1, CNR1, PNRC1, ACY1L2, GABRR1, UBE2J1, MDN1, CASP8AP2, CX62, BACH2, MAP3K7, EPHA7, SH3BGRL2, MYO6, CD109, B3GAT2, C6orf156, TBX18, ZNF292, GABRR2, RWDD2A, C6orf117)  
 chr6:102173151-102454306 (GRIK2)  
 chr9:39146894-39146894 (CNTNAP3)  
 chr11:55118213-55225135 (OR4C11, OR4P4, OR4C6, OR4S2)  
 chr11:79781212-79858759  
 chr17:26546112-26663306 (NF1, OMG, EVI2B)

---

Amp and Del represent the significantly (FDR < 0.25) amplified or deleted loci in each glioblastoma subclass. Subclass unique alterations are shown with chromosomal coordinates (Human Build 36) and associated genes.
